# Supplementary material
Source: PubMed Central journal article supplement (PMC3695651)
Supplement: supp_kxs037_kxs037supp.pdf [file supp_kxs037_kxs037supp.pdf]

APPENDIX A: ASYMPTOTIC VARIANCES OF  $\widehat{iPCF}$  AND  $\widehat{iPNF}$  ESTIMATED USING OBSERVED  
RISKS IN THE POPULATION

As in previous work for  $PCF$  and  $PNF$  (Pfeiffer and Gail, 2011), we use an influence function approach for functionals  $T(F_n)$  of the empirical distribution function,  $F_n$ , to obtain non-model based variance estimates through a first order approximation of  $T$  (Huber, 1996),

$$T(F_n) \approx T(F) + \frac{1}{n} \sum_1^n \psi(y_i). \quad (0.1)$$

The influence functions  $\psi(y_i)$  are independent with  $E\psi(y) = 0$ . Under regularity conditions that assure that the remainder term in the linearization is of the order  $o(n^{-1})$ , which are satisfied if  $T$  is Fréchet or Hadamard differentiable (van der Vaart, 1998),

$$\text{var}\{T(F_n)\} = \frac{1}{n} E\psi^2(y_i). \quad (0.2)$$

The asymptotic normality of  $n^{1/2}\{T(F_n) - T(F)\}$  follows from (0.1), (0.2) and the application of the central limit theorem. Under these regularity conditions, the influence functions  $\psi(y)$  can be computed as the derivative

$$\psi(y) = \frac{d}{dt} T(F_t)|_{t=0},$$

where  $F_t = (1-t)F + t\delta_y$  and  $\delta_y$  denotes the point mass at the point  $y$ .

We previously computed the influence function  $\psi_L$  for the Lorenz curve, i.e.  $T(F_n) = L_n$  (Pfeiffer and Gail, 2011), given by

$$\psi_L(r, p) = -\frac{1}{\mu}(r - \mu)L(p) - \frac{1}{\mu}\{F^{-1}(p) - r\}I\{r \leq F^{-1}(p)\} + \frac{1}{\mu}F^{-1}(p)p - L(p).$$

Thus the influence function of  $T(F_t) = -\int_0^{p^*} L_t$  and thus  $iPCF$  is obtained as

$$\psi_{iPCF}(r) = -\frac{d}{dt} T(F_t)|_{t=0} = -\frac{d}{dt} \left\{ \int_0^{p^*} L_t \right\} |_{t=0} = -\int_0^{p^*} \frac{d}{dt} L_t |_{t=0} = \int_0^{p^*} \psi_L(p, r) dp. \quad (0.3)$$

$E\psi_{iPCF}(r) = 0$  as  $E\psi_L(y) = 0$ .

Similarly, we get the asymptotic variance of  $\widehat{iPNF}$  by based on the influence function of  $PNF$ , or equivalently, the inverse of the Lorenz curve,  $L^{-1}$ ,

$$\psi_{L^{-1}}(r) = -L^{-1}(p) + \frac{r}{G^{-1}(p)}[p - I\{r \leq G^{-1}(p)\}] + I\{r \leq G^{-1}(p)\},$$

using a change of variable as

$$\psi_{iPNF}(r) = \int_0^{\gamma_q^*} -\frac{r}{u}\{G(u) - I(y \leq u)\} - I(y \leq u) + F(u)dG(u). \quad (0.4)$$

Again,  $E\psi_{iPNF} = 0$  as  $E\psi_{L^{-1}}(r) = 0$ .

APPENDIX B: ASYMPTOTIC VARIANCES OF  $\widehat{PCF}$ ,  $\widehat{PNF}$ ,  $\widehat{iPCF}$  AND  $\widehat{iPNF}$  ESTIMATED FROM CASE-CONTROL DATA

We utilize a partial influence function approach (Pires and Branco, 2002) that allows to derive the asymptotic properties of functionals of empirical distribution functions for two or more independent populations.

Let  $T(K_n, G_m)$  denote a functional of two empirical distribution functions,  $K_n$  and  $G_m$ , estimated from the independent samples  $x_i \sim K, i = 1, \dots, n$  and  $y_j \sim G, j = 1, \dots, m$  and let  $N = m + n$ . Then a first order approximation of  $T$  yields

$$T(K_n, G_m) \approx T(K, G) + \sum_i \psi_1(x_i)/n + \sum_j \psi_2(y_j)/m. \quad (0.5)$$

The partial influence functions  $\psi_1$  and  $\psi_2$  are independent with  $E_K\psi_1(x) = 0$  and  $E_G\psi_2(y) = 0$ . Again, under regularity conditions the remainder term in the linearization is of the order  $o(N^{-1})$  and, letting  $\lambda = n/N$ ,  $\sqrt{N}(T(K_n, G_m) - T(K, G)) \rightarrow N(0, \text{var}\{T(K_n, G_m)\})$  with

$$N\text{var}\{T(K_n, G_m)\} = \lambda^{-1}E_K\psi_1^2(x) + (1 - \lambda)^{-1}E_G\psi_2^2(y). \quad (0.6)$$

Letting  $K_t(y) = (1 - t)K(y) + t\delta_y$ , we compute the influence function  $\psi_1$  for  $T(K_t, G)$  as  $\psi_1 = \frac{d}{dt}T(K_t, G)|_{t=0}$ . Similarly we derive  $\psi_2 = \frac{d}{dt}T(K, G_t)|_{t=0}$ , with  $G_t(y) = (1 - t)G + t\delta_y$ .

We assume that the distributions  $G$  and  $K$  are sufficiently smooth so that their densities  $g$  and  $k$  and thus the density of the population distribution  $F$  given by  $f = \mu g + (1 - \mu)k$  in the points  $1-p$  and  $1-q$  exist. Letting  $\phi_{1-p} = F^{-1}(1-p)$ , the partial influence functions for  $PCF(p)$  are

$$\psi_1(x) = -(1 - \mu) \frac{g(\phi_{1-p})}{f(\phi_{1-p})} \{I(0, \phi_{1-p})(x) - K(\phi_{1-p})\}$$

and

$$\psi_2(y) = -\mu \frac{g(\phi_{1-p})}{f(\phi_{1-p})} \{I(0, \phi_{1-p})(y) - G(\phi_{1-p})\}.$$

The variance terms in (0.6) for  $PCF$  are

$$E_K \psi_1^2(x) = (1 - \mu)^2 \frac{g^2(\phi_{1-p})}{f^2(\phi_{1-p})} K(\phi_{1-p}) \{1 - K(\phi_{1-p})\}$$

and

$$E_G \psi_2^2(y) = \mu^2 \frac{g^2(\phi_{1-p})}{f^2(\phi_{1-p})} G(\phi_{1-p}) \{1 - G(\phi_{1-p})\}.$$

For  $PNF$ , letting  $\gamma_{1-q} = G^{-1}(1-q)$ , the partial influence functions are

$$\psi_1(x) = -(1 - \mu) \{I(0, \gamma_{1-q})(x) - K(\gamma_{1-q})\}$$

and

$$\psi_2(y) = (1 - \mu) \frac{k(\gamma_{1-q})}{g(\gamma_{1-q})} \{I(0, \gamma_{1-q})(y) - (1 - q)\}.$$

The corresponding variance terms are

$$E_K \psi_1^2 = (1 - \mu)^2 K(\gamma_{1-q}) \{1 - K(\gamma_{1-q})\} \text{ and } E_G \psi_2^2 = \left\{ (1 - \mu) \frac{k(\gamma_{1-q})}{g(\gamma_{1-q})} \right\}^2 q(1 - q).$$

For  $iPCF(p^*)$  we get, using Leibniz's rule,

$$\psi_1(x) = (1 - \mu) G(\phi_{1-p}) \{I(0, \phi_{1-p})(x) - K(\phi_{1-p})\} - (1 - \mu) \left\{ G(x) I(0, \phi_{1-p})(x) - \int_0^{\phi_{1-p}} G(u) dK(u) \right\}$$

and

$$\psi_2(y) = -(1 - \mu) K(\phi_{1-p}) \{I(0, \phi_{1-p})(y) - G(\phi_{1-p})\} + (1 - \mu) \left\{ K(y) I(0, \phi_{1-p})(y) - \int_0^{\phi_{1-p}} K(u) dG(u) \right\}$$

with corresponding variance terms

$$E_K \psi_1^2(x) = (1-\mu)^2 \left[ G^2(\phi_{1-p})K(\phi_{1-p})\{1-K(\phi_{1-p})\} + \int_0^{\phi_{1-p}} G(x)^2 dK(x) - \left\{ \int_0^{\phi_{1-p}} G(x) dK(x) \right\}^2 - 2G(\phi_{1-p})\{1-K(\phi_{1-p})\} \int_0^{\phi_{1-p}} G(x) dK(x) \right]$$

$$E_G \psi_2^2(y) = (1-\mu)^2 \left[ \int_0^{\phi_{1-p}} K(x)^2 dG(x) - \left\{ \int_0^{\phi_{1-p}} K(x) dG(x) \right\}^2 + K^2(\phi_{1-p})G(\phi_{1-p})\{1-G(\phi_{1-p})\} - 2K(\phi_{1-p})\{1-G(\phi_{1-p})\} \int_0^{\phi_{1-p}} K(x) dG(x) \right]$$

For  $iPNF(p^*)$ , using Leibniz's rule

$$\psi_1(x) = -(1-\mu)(1-q^*) \left\{ I(0, \gamma_{1-q})(x) - K(\gamma_{1-q}) \right\} + (1-\mu) \left\{ G(x)I(0, \gamma_{1-q})(x) - \int_0^{\gamma_{1-q}} G(u) dK(u) \right\}$$

and

$$\psi_2(y) = (1-\mu) \left[ K(\gamma_{1-q})\{I(0, \gamma_{1-q})(y) - 1 + q\} - K(y)I(0, \gamma_{1-q})(y) + \int_0^{\gamma_{1-q}} K(u) dG(u) \right]$$

and

$$E_K \psi_1^2(x) = (1-\mu)^2 \left[ K(\gamma_{1-q})\{1-K(\gamma_{1-q})\}(1-q)^2 + \int_0^{\gamma_{1-q}} G^2(u) dK(u) - \left\{ \int_0^{\gamma_{1-q}} G(u) dK(u) \right\}^2 - 2(1-q)\{1-K(\gamma_{1-q})\} \int_0^{\gamma_{1-q}} G(x) dK(x) \right]$$

$$E_G \psi_2^2(y) = (1-\mu)^2 \left[ K^2(\gamma_{1-q})q(1-q) - 2(1-q)K(\gamma_{1-q}) \int_0^{\gamma_{1-q}} K(u) dG(u) + \int_0^{\gamma_{1-q}} K^2(u) dG(u) - \left\{ \int_0^{\gamma_{1-q}} K(u) dG(u) \right\}^2 \right]$$

#### APPENDIX C: ASYMPTOTIC VARIANCES OF $\widehat{PCF}$ , $\widehat{PNF}$ , $i\widehat{PCF}$ AND $i\widehat{PNF}$ ESTIMATED

##### USING RISKS AND OUTCOMES IN A COHORT

Here we observe  $(r_i^F, y_i), i = 1, \dots, N$  of risks and associated outcomes in a population, that are realizations of the bivariate random variable  $(R, Y) \sim F(r, y)$ . We now treat  $\widehat{PCF}$ ,  $\widehat{PNF}$ ,  $i\widehat{PCF}$

and  $\widehat{iPNF}$  as continuous functionals of the bivariate empirical distribution function

$$F_N(r^*, y^*) = \frac{1}{N} \sum_{i=1}^N I(r_i \leq r^*, y_i \leq y^*).$$

To derive the influence functions, we use that the marginal distribution function of the risk  $R$  is  $F_R(r) = \int_y dF(r, y)$  and the distribution of risk in cases is  $G(r) = F(r, y = 1)/\mu$ , where  $\mu = P(y = 1)$ . As  $G_t = 1/\mu_t F_t(r, y = 1)$ ,

$$\frac{d}{dt} G_t(x) = -\frac{1}{\mu} (y - \mu) G(x) + \frac{1}{\mu} \delta(x, y = 1) - G(x)$$

and

$$\frac{d}{dt} G_t^{-1}(p) = \frac{1}{\mu g(\gamma_p)} \{-(y - \mu) + I(0, \gamma_p) - p\mu\}.$$

Based on similar linearization arguments as used for the derivations in Appendix A, we obtain that both  $\widehat{PCF}$  and  $\widehat{PNF}$  based on  $(r^F, y)$  are asymptotically normally distributed with variances obtained from the bivariate influence functions

$$\begin{aligned} \psi_{PCF}(r, y) = \frac{1}{\mu} (y - \mu) G(\phi_{1-p}) + \frac{g(\phi_{1-p})}{f(\phi_{1-p})} \{I(0, \phi_{1-p})(r) - (1-p)\} - \\ \left\{ \frac{1}{\mu} I(0, \phi_{1-p})(r, y = 1) - G(\phi_{1-p}) \right\} \end{aligned}$$

and

$$\begin{aligned} \psi_{PNF}(r, y) = -\frac{f_R(\gamma_{1-q})}{g(\gamma_{1-q})} \{-(y - \mu)(1-q) + \\ \frac{1}{\mu} I(0, \gamma_{1-q})(r) - (1-q) - I(0, \gamma_{1-q})(r) + F_R(\gamma_{1-q})\}, \end{aligned}$$

where  $\phi_{1-p} = F_R^{-1}(1-p)$  and  $\gamma_{1-q} = G^{-1}(1-q)$ .

For  $iPCF$ , the bivariate influence function is given by

$$\begin{aligned} \psi_{iPCF}(r, y) = \{I(0, \phi_{1-p})(r) - (1-p)\} G(\phi_{1-p}) + \frac{y - \mu}{\mu} \int_0^{\phi_{1-p}} G(x) dF_R(x) - \\ \int_0^{\phi_{1-p}} \frac{I(x, y = 1)(r)}{\mu} dF_R(x) - G(r) I(0, \phi_{1-p})(r) + 2 \int_0^{\phi_{1-p}} G(x) dF_R(x), \end{aligned}$$

and for  $iPNF$ , by

$$\begin{aligned} \psi_{iPNF}(r, y)(q) = & -F_R(\gamma_{1-q}) \left\{ \frac{y - \mu}{\mu} (1 - q) - \frac{1}{\mu} I(0, \gamma_{1-q})(r, y = 1) + (1 - q) \right\} \\ & + \frac{y - \mu}{\mu} \int_0^{\gamma_{1-q}} F_R(x) dG(x) - \frac{1}{\mu} I(0, \gamma_{1-q})(r, y = 1) F_R(r) \\ & + 2 \int_0^{\gamma_{1-q}} F_R(x) dG(x) - \int_0^{\gamma_{1-q}} I(0, x)(r) dG(x). \end{aligned}$$

## REFERENCES

- HUBER, P.J. (1996). Robust Statistical Procedures. Society for Industrial and Applied Mathematics.
- PFEIFFER R.M., GAIL M.H. (2011). Two criteria for evaluating risk prediction models, *Biometrics* 67 (3), 1057–1065.
- PIRES, A. M. AND BRANCO, J. A. (2002). Partial influence functions. *Journal of Multivariate Analysis* 83, 2, 451-468.
- VAN DER VAART, A.W. (1998). Asymptotic Statistics. Cambridge University Press, Cambridge, UK.
