# Supplementary material
Source: PubMed Central journal article supplement (PMC3695651)
Supplement: supp_kxs037_kxs037supp1.pdf [file supp_kxs037_kxs037supp1.pdf]

Table 1. Mean values of  $PCF$  and  $PNF$  estimated using observed risks  $R$  in a population assuming that the model is well calibrated; risk estimates in a case-control sampling when disease prevalence  $\mu$  is known, and based on observations of  $(R, Y)$  in the population. Results are based on 500 simulations for each set of parameters  $(\alpha, \beta)$  for the beta distribution and values of  $q$  and  $p$ . Each simulation has  $N = 10000$  samples with  $\mu = 0.3$ .  $ARE$ s are computed as the ratio of the influence function based variances.

| $p$                                 | $PCF$ | $\widehat{PCF}$ |      |          | $var(\widehat{PCF})$ |      |          | $ARE^{\S}$ |            |             |
|-------------------------------------|-------|-----------------|------|----------|----------------------|------|----------|------------|------------|-------------|
|                                     | true  | $R$             | $CC$ | $(R, Y)$ | $R$                  | $CC$ | $(R, Y)$ | $CC/R$     | $(R, Y)/R$ | $(R, Y)/CC$ |
| $\alpha = 6.55, \beta = 15.28^*$    |       |                 |      |          |                      |      |          |            |            |             |
| 0.10                                | 0.16  | 0.16            | 0.16 | 0.16     | 0                    | 0.24 | 0.25     | 71.02      | 71.80      | 1.01        |
| 0.20                                | 0.29  | 0.29            | 0.29 | 0.29     | 0.01                 | 0.42 | 0.42     | 63.48      | 64.34      | 1.01        |
| 0.30                                | 0.42  | 0.42            | 0.42 | 0.42     | 0.01                 | 0.52 | 0.53     | 61.40      | 62.26      | 1.01        |
| 0.40                                | 0.53  | 0.53            | 0.53 | 0.53     | 0.01                 | 0.56 | 0.57     | 61.20      | 62.03      | 1.01        |
| $\alpha = 1, \beta = 2.33^{**}$     |       |                 |      |          |                      |      |          |            |            |             |
| 0.10                                | 0.25  | 0.25            | 0.25 | 0.25     | 0.02                 | 0.20 | 0.24     | 8.82       | 10.63      | 1.21        |
| 0.20                                | 0.43  | 0.43            | 0.43 | 0.43     | 0.04                 | 0.38 | 0.44     | 8.70       | 10.15      | 1.17        |
| 0.30                                | 0.58  | 0.58            | 0.58 | 0.58     | 0.05                 | 0.47 | 0.54     | 9.21       | 10.41      | 1.13        |
| 0.40                                | 0.70  | 0.70            | 0.70 | 0.70     | 0.05                 | 0.48 | 0.52     | 10.00      | 10.95      | 1.09        |
| $\alpha = 0.3, \beta = 0.701^{***}$ |       |                 |      |          |                      |      |          |            |            |             |
| 0.10                                | 0.31  | 0.31            | 0.31 | 0.31     | 0.08                 | 0.06 | 0.22     | 0.77       | 2.63       | 3.43        |
| 0.20                                | 0.56  | 0.56            | 0.56 | 0.56     | 0.17                 | 0.24 | 0.50     | 1.45       | 3.03       | 2.10        |
| 0.30                                | 0.75  | 0.74            | 0.75 | 0.74     | 0.15                 | 0.34 | 0.53     | 2.31       | 3.57       | 1.55        |
| 0.40                                | 0.87  | 0.87            | 0.87 | 0.87     | 0.09                 | 0.30 | 0.38     | 3.50       | 4.46       | 1.27        |
| $q$                                 | $PNF$ | $\widehat{PNF}$ |      |          | $var(\widehat{PNF})$ |      |          | $ARE$      |            |             |
|                                     | true  | $R$             | $CC$ | $(R, Y)$ | $R$                  | $CC$ | $(R, Y)$ | $CC/R$     | $(R, Y)/R$ | $(R, Y)/CC$ |
| $\alpha = 6.55, \beta = 15.28^*$    |       |                 |      |          |                      |      |          |            |            |             |
| 0.90                                | 0.82  | 0.82            | 0.82 | 0.82     | 0.01                 | 0.50 | 0.51     | 77.19      | 77.64      | 1.01        |
| 0.80                                | 0.69  | 0.69            | 0.69 | 0.69     | 0.01                 | 0.61 | 0.61     | 67.99      | 68.55      | 1.01        |
| 0.70                                | 0.58  | 0.58            | 0.58 | 0.58     | 0.01                 | 0.61 | 0.62     | 64.54      | 65.20      | 1.01        |
| 0.60                                | 0.47  | 0.47            | 0.47 | 0.47     | 0.01                 | 0.56 | 0.57     | 59.14      | 59.86      | 1.01        |
| $\alpha = 1, \beta = 2.33^{**}$     |       |                 |      |          |                      |      |          |            |            |             |
| 0.90                                | 0.64  | 0.64            | 0.64 | 0.64     | 0.05                 | 0.78 | 0.81     | 14.68      | 15.22      | 1.04        |
| 0.80                                | 0.50  | 0.50            | 0.50 | 0.50     | 0.05                 | 0.57 | 0.60     | 11.27      | 12.04      | 1.07        |
| 0.70                                | 0.40  | 0.40            | 0.40 | 0.40     | 0.04                 | 0.40 | 0.44     | 9.94       | 10.92      | 1.10        |
| 0.60                                | 0.31  | 0.31            | 0.31 | 0.31     | 0.03                 | 0.28 | 0.32     | 9.22       | 10.37      | 1.13        |
| $\alpha = 0.3, \beta = 0.7^{***}$   |       |                 |      |          |                      |      |          |            |            |             |
| 0.90                                | 0.44  | 0.44            | 0.44 | 0.44     | 0.11                 | 0.44 | 0.53     | 4.19       | 5.05       | 1.21        |
| 0.80                                | 0.34  | 0.34            | 0.34 | 0.34     | 0.08                 | 0.22 | 0.31     | 2.75       | 3.89       | 1.42        |
| 0.70                                | 0.27  | 0.27            | 0.27 | 0.27     | 0.06                 | 0.12 | 0.20     | 2.02       | 3.36       | 1.66        |
| 0.60                                | 0.22  | 0.22            | 0.22 | 0.22     | 0.04                 | 0.06 | 0.13     | 1.57       | 3.10       | 1.97        |

\* AUC=0.63, \*\* AUC=0.79 \*\*\* AUC= 0.92

$\S$ ARE = asymptotic relative efficiency, the ratio of the influence functions based variances

$CC/R = \text{var}(T_{CC})/\text{var}(T_R)$ ,  $(R, Y)/R = \text{var}(T_{(R, Y)})/\text{var}(T_R)$ ,  $(R, Y)/CC = \text{var}(T_{(R, Y)})/\text{var}(T_{CC})$ , where  $T = PCF$  or  $T = PNF$  respectively

Table 2. Mean values of  $iPCF$  and  $iPNF$  estimated using: the population risk distribution  $F(R)$  assuming that the model is well calibrated; risks in a case-control study and known disease prevalence  $\mu$ ; observations of  $(R, Y)$  in the population. Results are based on 500 simulations for each set of parameters  $(\alpha, \beta)$  for the beta distribution and values of  $q$  and  $p$ . Each simulation has  $N = 10000$  samples with  $\mu = 0.3$ .  $ARE$ s are computed as the ratio of the influence function based variances.

| $p^*$                            | $iPCF$ | $\widehat{iPCF}$ |      |          | $var(\widehat{iPCF})$ |      |          | $ARE$  |            |             |
|----------------------------------|--------|------------------|------|----------|-----------------------|------|----------|--------|------------|-------------|
|                                  | true   | $R$              | $CC$ | $(R, Y)$ | $R$                   | $CC$ | $(R, Y)$ | $CC/R$ | $(R, Y)/R$ | $(R, Y)/CC$ |
| $\alpha = 6.55, \beta = 15.28^*$ |        |                  |      |          |                       |      |          |        |            |             |
| 0.10                             | 0.58   | 0.58             | 0.58 | 0.58     | 0                     | 0.15 | 0.15     | 44.61  | 45.51      | 1.02        |
| 0.20                             | 0.56   | 0.56             | 0.56 | 0.56     | 0                     | 0.14 | 0.14     | 49.48  | 50.09      | 1.01        |
| 0.30                             | 0.52   | 0.52             | 0.52 | 0.52     | 0                     | 0.11 | 0.11     | 49.30  | 50.51      | 1.02        |
| 0.40                             | 0.48   | 0.48             | 0.48 | 0.48     | 0                     | 0.08 | 0.08     | 58.35  | 58.22      | 1.00        |
| $\alpha = 1, \beta = 2.33^{**}$  |        |                  |      |          |                       |      |          |        |            |             |
| 0.10                             | 0.69   | 0.69             | 0.69 | 0.69     | 0.01                  | 0.11 | 0.12     | 7.74   | 9.00       | 1.16        |
| 0.20                             | 0.66   | 0.66             | 0.66 | 0.66     | 0.01                  | 0.09 | 0.10     | 9.05   | 10.45      | 1.16        |
| 0.30                             | 0.61   | 0.61             | 0.61 | 0.61     | 0.01                  | 0.06 | 0.07     | 9.66   | 10.53      | 1.09        |
| 0.40                             | 0.54   | 0.54             | 0.54 | 0.54     | 0                     | 0.04 | 0.04     | 10.34  | 10.79      | 1.04        |
| $q^*$                            | $iPNF$ | $\widehat{iPNF}$ |      |          | $var(\widehat{iPNF})$ |      |          | $ARE$  |            |             |
|                                  | true   | $R$              | $CC$ | $(R, Y)$ | $R$                   | $CC$ | $(R, Y)$ | $CC/R$ | $(R, Y)/R$ | $(R, Y)/CC$ |
| $\alpha = 6.55, \beta = 15.28^*$ |        |                  |      |          |                       |      |          |        |            |             |
| 0.60                             | 0.88   | 0.88             | 0.88 | 0.88     | 0                     | 0.06 | 0.06     | 51.68  | 52.65      | 1.02        |
| 0.70                             | 0.93   | 0.93             | 0.93 | 0.93     | 0                     | 0.03 | 0.03     | 53.34  | 54.00      | 1.01        |
| 0.80                             | 0.97   | 0.97             | 0.97 | 0.97     | 0                     | 0.01 | 0.01     | 60.50  | 60.89      | 1.01        |
| 0.90                             | 0.99   | 0.99             | 0.99 | 0.99     | 0                     | 0    | 0        | 65.63  | 65.43      | 1.00        |
| $\alpha = 1, \beta = 2.33^{**}$  |        |                  |      |          |                       |      |          |        |            |             |
| 0.60                             | 0.81   | 0.81             | 0.81 | 0.81     | 0.01                  | 0.06 | 0.07     | 10.31  | 11.67      | 1.13        |
| 0.70                             | 0.88   | 0.88             | 0.88 | 0.88     | 0.0006                | 0.04 | 0.04     | 10.02  | 10.90      | 1.09        |
| 0.80                             | 0.93   | 0.93             | 0.93 | 0.93     | 0.0002                | 0.02 | 0.02     | 9.47   | 9.90       | 1.05        |
| 0.90                             | 0.98   | 0.98             | 0.98 | 0.98     | 0                     | 0.01 | 0.01     | 14.67  | 15.09      | 1.03        |
| $\alpha = 0.3, \beta = 0.7^{**}$ |        |                  |      |          |                       |      |          |        |            |             |
| 0.60                             | 0.15   | 0.15             | 0.15 | 0.15     | 0.01                  | 0.03 | 0.04     | 2.30   | 3.18       | 1.38        |
| 0.70                             | 0.12   | 0.12             | 0.12 | 0.12     | 0.01                  | 0.02 | 0.03     | 2.68   | 3.72       | 1.39        |
| 0.80                             | 0.09   | 0.09             | 0.09 | 0.09     | 0                     | 0.01 | 0.02     | 3.62   | 4.40       | 1.21        |
| 0.90                             | 0.05   | 0.05             | 0.05 | 0.05     | 0                     | 0.01 | 0.01     | 5.77   | 6.37       | 1.10        |

\* AUC=0.63, \*\* AUC=0.79 \*\*\* AUC= 0.92

$\S$ ARE = asymptotic relative efficiency, the ratio of the influence functions based variances

$CC/R = \text{var}(T_{CC})/\text{var}(T_R)$ ,  $(R, Y)/R = \text{var}(T_{(R, Y)})/\text{var}(T_R)$ ,  $(R, Y)/CC = \text{var}(T_{(R, Y)})/\text{var}(T_{CC})$ , where  $T = PCF$  or  $T = PNF$  respectively
